# Supplementary material for: MicroRNAs Enable mRNA Therapeutics to Selectively Program Cancer Cells to Self-Destruct
Source: PubMed Central journal article supplement (PMC6157376; doi:10.1089/nat.2018.0734), 2018-09-24
Supplement: Supp_Fig2.pdf [file Supp_Fig2.pdf]

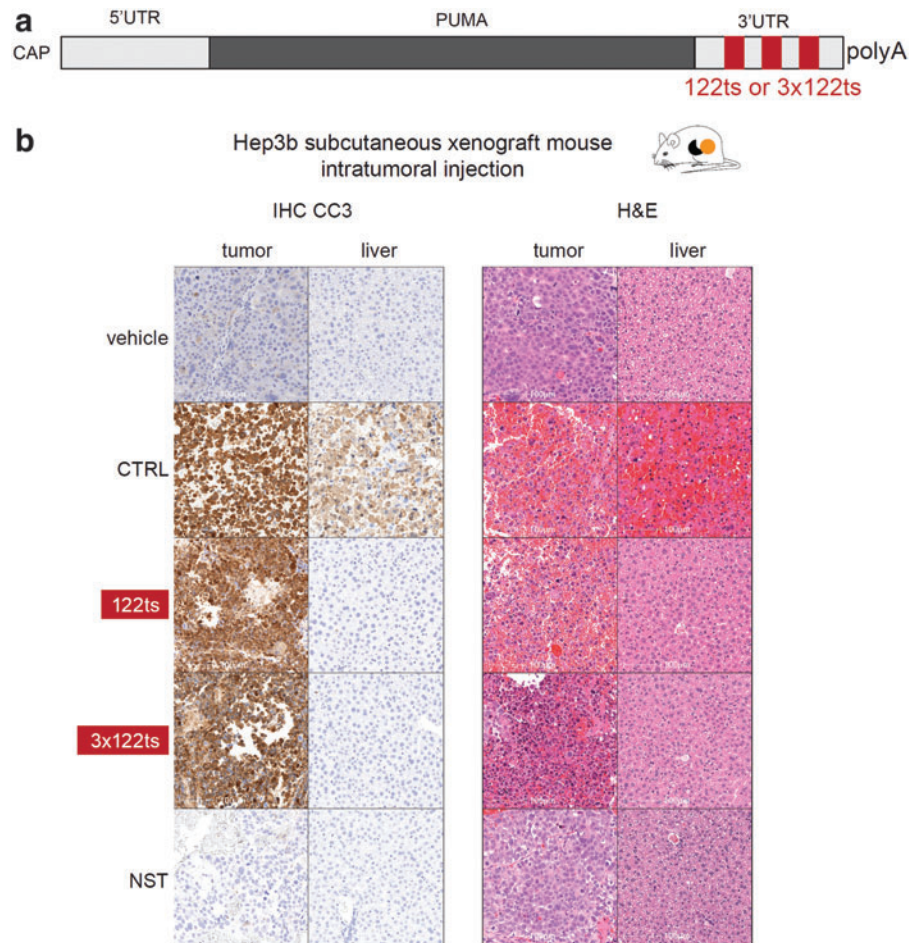

**SUPPLEMENTARY FIG. S2.** Intratumoral delivery of MC3-encapsulated PUMA-122ts triggers apoptosis in tumor cells while alleviating liver toxicity. **(a)** Schematic representation of PUMA mRNA with miR122 target site(s) (122ts or  $3 \times 122ts$ ) in the 3' UTR. **(b)** PUMA-122ts triggers apoptosis in tumor cells while alleviating liver toxicity in a Hep3b subcutaneous xenograft mouse model. Representative images from tumor and liver IHC for CC3, and H&E staining 6 h after intratumoral injection of 25- $\mu$ g PUMA mRNA. NST represents an RNA with a similar sequence where all identifiable start codons AUG, CUG, and GUG have been removed. IHC, immunohistochemistry; CC3, cleaved caspase 3; H&E, hematoxylin and eosin; NST, nonstart RNA.
