# Supplementary material for: MicroRNAs Enable mRNA Therapeutics to Selectively Program Cancer Cells to Self-Destruct
Source: PubMed Central journal article supplement (PMC6157376; doi:10.1089/nat.2018.0734), 2018-09-24
Supplement: Supp_Table1.pdf [file Supp_Table1.pdf]

SUPPLEMENTARY TABLE S1. LIST OF SEQUENCES USED

5' UTR

GGGAAATAAGAGAGAAAAGAAGAGTAAGAAGAAATATAAGAGCCACC

3' UTR (control)

TGATAATAGGCTGGAGCCTCGGTGGCCATGCTTCTTGCCCCTTGGGCCTCCCCCAGCCCCTCCTCCCCTTCT  
GCACCCGTACCCCCGTGGTCTTTGAATAAAGTCTGAGTGGGCGGC

3' UTR (122ts).

TGATAATAGGCTGGAGCCTCGGTGGCCATGCTTCTTGCCCCTTGGGCCTCCCCCAGCCCCTCCTCCCCTTCT  
GCACCCGTACCCCCCAAACACCATTGTCACACTCCAGTGGTCTTTGAATAAAGTCTGAGTGGGCGGC

3' UTR (142ts)

TGATAATAGGCTGGAGCCTCGGTGGCCATGCTTCTTGCCCCTTGGGCCTCCCCCAGCCCCTCCTCCCCTTCT  
GCACCCGTACCCCCCTCCATAAAGTAGGAAACACTACAGTGGTCTTTGAATAAAGTCTGAGTGGGCGGC

3' UTR (122ts +142ts)

TGATAATAGTCCATAAAGTAGGAAACACTACAGCTGGAGCCTCGGTGGCCATGCTTCTTGCCCCTTGGGCC  
CAAACACCATTGTCACACTCCATCCCCCAGCCCCTCCTCCCCTTCTGCACCCGTACCCCCGTGGTCTTT  
GAATAAAGTCTGAGTGGGCGGC

3' UTR (142ts) (RLM-RACE)

TGATAATAGTCCATAAAGTAGGAAACACTACAGCTGGAGCCTCGGTGGCCATGCTTCTTGCCCCTTGGGCCT  
CCCCCAGCCCCTCCTCCCCTTCTGCACCCGTACCCCCGTGGTCTTTGAATAAAGTCTGAGTGGGCGGC

3' UTR (3X\_122ts)

TGATAATAGCAAACACCATTGTCACACTCCAGCTGGAGCCTCGGTGGCCATGCTTCTTGCCCCTTGGGCC  
CAAACACCATTGTCACACTCCATCCCCCAGCCCCTCCTCCCCTTCTGCACCCGTACCCCCCAAACAC  
CATTGTCACACTCCAGTGGTCTTTGAATAAAGTCTGAGTGGGCGGC

Luc ORF

ATGGAAGATGCGAAGAACATCAAGAAGGGACCTGCCCCGTTTTACCCTTTGGAGGACGGTACAGCAGGAGA  
ACAGCTCCACAAGGCGATGAAACGCTACGCCCTGGTCCCCGGAACGATTGCGTTTACCGATGCACATATT  
GAGGTAGACATCACATACGCAGAATACTTCGAAATGTCGGTGGAGCTGGCGGAAGCGATGAAGAGATATG  
GTCTTAACACTAATCACCGCATCGTGGTGTGTTCCGAGAACTCATTGCAGTTTTTTCATGCCGGTCTTGGAG  
CACTTTTCATCGGGGTCGCAGTCGCGCCAGCGAACGACATCTACAATGAGCGGGAACCTTGAATAGCATG  
GGAATCTCCCAGCCGACGGTCGTGTTGTCTCCAAAAGGGGCTGCAGAAAATCCTCAACGTGCAGAAG  
AAGTCCCCATTATTCAAAAGATCATATTGATAGCAAGACGATTACCAAGGGTCCAGTCGATGT  
ATACCTTTGTGACATCGCATTTGCGCCAGGGTTAACGAGTATGACTTCGTCCCCGAGTCATTTGACAGA  
GATAAAACCATCGCGCTGATTATGAATTCCTCGGGTAGCACCGGTTTGCCAAAGGGGGTGGCGTTGCCCC  
ACCGCACTGCTTGTGTGCGGTTCTCGCACGCTAGGGATCCTATCTTTGGTAATCAGATCATTCCCGACACAG  
CAATCCTGTCCGTGGTACCTTTTCATCACGGTTTTGGCATGTTACGACTCTCGGCTATTGATTTGCGGTT  
TCAGGGTCGTACTTATGTATCGGTTTCGAGGAAGAAGTGTGTTTTCGATCCTTGCAAGATTACAAGATCCAG  
TCGGCCCTCCTTGTGCCAACGCTTTTTCATTCTTTGCGAAATCGACACTATTGATAAGTATGACCTTTC  
AATCTGCATGAGATTGCCCTCAGGGGAGCGCCGCTTAGCAAGGAAGTCGGGGAGGCAGTGGCCAAGCGC  
TTCCACCTTCCCGGAATTCGGCAGGGATACGGGCTCACGGAGACAACATCCGCGATCCTTATCACGCCCCA  
GGGTGACGATAAGCCGGGAGCCGTCGGAAAAGTGGTCCCCTTCTTTGAAGCCAAGGTCGTAGACCTCGA  
CACGGGAAAAACCCTCGGAGTGAACCAGAGGGGGCGAGCTCTGCGTGAGAGGGCCGATGATCATGTCAGG  
TTACGTGAATAACCCTGAAGCGACGAATGGCTGATGACAGGATGGGTGGTTCATGACCTGGGAGACAT  
TGCTATTGGGATGAGGATGAGCACTTCTTTATCGTAGATCGACTTAAGAGCTTGATCAAATACAAAGGC  
TATCAGGTAGCGCCTGCCGAGCTCGAGTCAATCCTGCTCCAGCACCCCAACATTTTCGACGCCGGAGTG  
GCCGGGTTGCCCGATGACGACGCGGGTGGCTGCCAGCGGCCGTGGTAGTCTCGAACATGGGAAAACA  
ATGACCGAAAAGGAGATCGTGGACTACGTAGCATCACAAGTGACGACTGCGAAGAACTGAGGGGAGGG  
GTAGTCTTTGTGGACGAGGTCCCGAAAGGCTTGACTGGGAAGCTTGACGCTCGCAAAATCCGGGAAATCCT  
GATTAAGGCAAAGAAAGGCGGGAAAATCGCTGTC

Epo ORF

ATGGGAGTGCACGAGTGTCCCAGCTGGTGTGGTTGCTGCTGTCGCTCTTGAGCCTCCCCTGAGGACTGCCTG  
TGCTGGGGGACACCACCCAGATTGATCTGCGACTCACGGGTACTTGAGAGGTACCTTCTTGAAGCCAAAGA  
AGCCGAAAACATCACAACCGGATGCGCCGAGCACTGCTCCCTCAATGAGAACATTACTGTACCGGATACA  
AAGGTCAATTTCTATGCATGGAAGAGAATGGAAGTAGGACAGCAGGCCGTCGAAGTGTGGCAGGGGCTCG  
CGCTTTTGTGCGAGGCGGTGTTGCGGGGTCAGGCCCTCCTCGTCAACTCATCACAGCCGTGGGAGCCCCCT  
CAACTTCATGTCGATAAAGCGGTGTCGGGGCTCCGCAGCTTGACGACGTTGCTTCGGGCTCTGGGCGCAC  
AAAAGGAGGCTATTTCGCCGCTGACGCGGCCTCCGCGCACCCCTCCGAACGATCACCCGCGACACGTT  
TAGGAAGCTTTTATGAGTGTACAGCAATTTCTCCGCGAAAGCTGAAATTTGATACTGGTGAAGCGTGTA  
GGACAGGGGATCGC

PUMA ORF

ATGATCCCCCGGAGGAGCAGTGGGCGCGCGAGATCGGTGCACAACCTGCGCAGAATGGCGGATGATCTGAA  
TGCTCAGTATGAGCGTAGGGACTGTCCGAGGCTAAACCAGCCACTCCTGAGATTCAAGAAATTGTGGAT  
AAAGTAAAACCTCAGCTGGAGGAGAAAATAATGAAACATATGGGAAACTCGAAGCCGTGCAGTACAA  
GACGCAAGTTCTGGCGAGCACCAATTACTATCAAGGTGCGCGCAGGCGATAATAAATATATGCACCT  
GAAAGTATTTAAGGGCCAGGCGAGAATGCAGATAGAGTGCTGACGATATCAGGTCGATAAAAA  
TAAGGACGATGAACTGACGGGTTTCGATTACAAAGATGACGATGACAAA

(continued)

SUPPLEMENTARY TABLE S1. (CONTINUED)

Caspase ORF

ATGGTAGAAATAGATGCAGCCTCCGTTTACACGCTGCCTGCTGGAGCTGACTTCCTCATGTGTTACTCTGTT  
GCAGAAGGATATTATTCTCACCGGGAAACTGTGAACGGCTCATGGTACATTCAAGATTTGTGTGAGATG  
TTGGGAAAATATGGCTCCTCCTTAGAGTTCACAGAACTCCTCACACTGGTGAACAGGAAAGTTTCTCAGC  
GCCGAGTGGACTTTTGC AAAGACCCAAGTGAATTTGGAAAGAAGCAGGTTCCCTGTTTTGCCTCAATGCT  
AACTAAAAAGCTGCATTTCTTTCCAAAATCTAATCTCGAGCACCACCACCACCACGTTGAAATTGAT  
GGGGGATCCCCCATGAGCTCGGCCTCGGGGCTCCGCAGGGGGCACCCGGCAGGTGGGGAAGAAAACAT  
GACAGAAACAGATGCCTTCTATAAAAAGAGAAATGTTTGATCCGGCAGAAAAGTACAAAATGGACCACAG  
GAGGAGAGGAATTGCTTTAATCTTCAATCATGAGAGGTTCTTTTGGCACTTAACACTGCCAGAAAGGCGG  
GGCACCTGCGCAGATAGAGACAATCTTACCCGCAGGTTTTTCAGATCTAGGATTTGAAGTGAATGCTTTA  
ATGATCTTAAAGCAGAAGAACTACTGCTCAAAAATTCATGAGGTGTCAACTGTTAGCCACGCAGATGCCGA  
TTGCTTTGTGTGTGCTTCCCTGAGCCATGGCGAAGGCAATCACATTTATGCATATGATGCTAAAATCGAAA  
TTCAGACATTAAGTGGCTTGTTCAAAGGAGACAAGTGTACAGCCTGGTTGGAAAACCCAAGATATTTAT  
CATCCAGGCATGTCCGGGAAACCAGCACGATGTGCCAGTCATTCCTTTGGATGTAGTAGAT

NST

AGGGTAGAAATAGATCCAGCCTCCGTTTACACGTTGCTTGTGGAGTTGACTTCCTCTTGTCTTACTTTGTTG  
CAGAAGGATATTATTCTCACCGGGAAATTGTCAACGGCTCATTGTACATTCAAGATTTGTCTCAGATCTTG  
GGAAAATAGCGCTCCTCCTTAGAGTTCACAGAACTCCTCACATTGGTCAACAGGAAAGTTTCTCAGCGCC  
GAGTCGACTTTTGC AAAGACCCAAGTCCAATTTGGAAAGAAGCAGGTTCCCTGTTTTGCCTCATTGCTAAC  
TAAAAGTTGCATTTCTTTCCAAAATCTAATCTCGAGCACCACCACCACCACGTTGAAATTGATTGG  
GGATCCCCATTAGCTCGGCCTCGGGGCTCCGCAGGGGGCACCCGGCAGGTCCGGGAAGAAAACATTACA  
GAAACAGATTCCTTCTATAAAAAGAGAAATCTTTGATCCGGCAGAAAAGTACAAAATCGACCACAGGAGG  
AGAGGAATTGCTTTAATCTTCAATCATCAGAGGTTCTTTTGGCACTTAACATTGCCAGAAAGGCGGGGCA  
CTTGCGCAGATAGAGACAATCTTACCCGCAGGTTTTTCAGATCTAGGATTTGAAGTCAAATCCTTTAATCAT  
CTTAAAGCAGAAGAACTATTGCTCAAAAATTCATCAGGTCTCAATTGTTAGCCACGCAGATCCCGATTGCTT  
TGTCTCTCTCTTCTTGGAGCCATCGCGAAGGCAATCACATTTATCCATATCATCCTAAAATCGAAATTCAGAC  
ATTAATTGGCTTGTTCAAAGGAGACAAGTCTCACAGCTTGGTTGGAAAACCCAAGATATTTATCATCCAG  
GCATCTCGGGGAAACCAGCACGATTTGCCAGTCATTCCTTTGGATCTAGTAGAT

Micro RNA target sites are indicated in *bold*.

Luc, luciferase; Epo, erythropoietin; NST, non-start RNA; ORF, open reading frame; UTR, untranslated region.
