# Supplementary material for: MicroRNAs Enable mRNA Therapeutics to Selectively Program Cancer Cells to Self-Destruct
Source: PubMed Central journal article supplement (PMC6157376; doi:10.1089/nat.2018.0734), 2018-09-24
Supplement: Supp_Table2.pdf [file Supp_Table2.pdf]

SUPPLEMENTARY TABLE S2. LIST OF PRIMERS USED

| <i>Primer</i>         | <i>Sequence</i>                                    |
|-----------------------|----------------------------------------------------|
| Pforward              | TGGACCCCTCGTACAGAAGCTAATACG                        |
| Preverse              | (T) <sub>100</sub> GCCGCCCCTCAGACTTTATTCAAAGACCAC  |
| Pf <sub>1</sub> (Luc) | GAAGATGCCAAGAACATCAAGAAGGGAC                       |
| Pr <sub>1</sub> (Luc) | GGACCAGGGCGTAGCGTTTCATCGCC                         |
| Pf <sub>2</sub> (Luc) | GTGCGGTTCTCGCACGCTAGGGATCCTATC                     |
| Pr <sub>2</sub> (Luc) | CCGCAAATCAAATAGCCGAGAGTCGTGAAC                     |
| Pf <sub>3</sub> (Luc) | CCAACATTTTCGACGCCGGAGTGGCCG                        |
| Pr <sub>3</sub> (Luc) | CCTTTTCGGTCATTGTTTTCCCATGTTTCGAG                   |
| Pf (Epo)              | TGCATGGAAGAGAATGGAAGTAGGACAGC                      |
| Pr(Epo)               | GATGAGTTGACGAGGAGGGCCTGAC                          |
| HPRT_f                | CAATGCAGACTTTGCTTTCCTTGGTCAGGCAG                   |
| HPRT_r                | TCCAACACTTCGTGGGGTCCTTTTCACCAGC                    |
| 3'-oligo              | TTCAGACGTGTGCTCTTCCGATCTCCACTCAGACTTTATTCAAAGACCAC |

HPRT, Hypoxanthine phosphoribosyltransferase.
